# Supplementary material
Source: publisher figshare collection journal article supplement (https://karger.figshare.com/ndownloader/files/33002813)
Supplement: Supplementary file 1 [file 33002813]

**APPENDIX**

***HEAD Study Group***: Catherine Lunter (Coffs Harbour Hospital, New South Wales, Australia), Rochelle Facer (Concord Repatriation Hospital, New South Wales, Australia), David Thomson (Port Macquarie Base and Kempsey District Hospitals, New South Wales, Australia), Robert Day (Royal North Shore Hospital, New South Wales, Australia), Greg McDonald (Sydney Adventist Hospital, New South Wales, Australia), Sarah Jones (Tamworth Regional Hospital, New South Wales, Australia), Julian Cochrane (Orange Base Hospital, New South Wales, Australia), Stephen Gourley (Alice Springs Hospital, Northern Territory, Australia), Mark Ross & Vinay Gangathimmaiah (Royal Darwin Hospital, Northern Territory, Australia), Kim Hansen (St Andrew's War Memorial Hospital, Queensland, Australia), Frances B. Kinnear (The Prince Charles Hospital, Queensland, Australia), Gerben Keijzers (Gold Coast University Hospital, Queensland, Australia), Kevin Chu (Royal Brisbane and Women's Hospital, Queensland, Australia), Paul Bowe (Robina Hospital, Queensland, Australia), Raymund de la Cruz (Lyell McEwin and Modbury Hospitals, South Australia, Australia), Daniel Haustead (The Queen Elizabeth and Royal Adelaide Hospitals, South Australia, Australia), Jean Moller (University Hospital Geelong, Victoria, Australia), Katie Walker (Cabrini Malvern, Victoria, Australia), Richard D. Smith (Bendigo Health, Victoria, Australia), Ron Sultana (Epworth Healthcare, Victoria, Australia), John Pasco (Werribee Mercy Hospital, Victoria, Australia), Neil Goldie and Andis Graudins (Monash Health, Victoria, Australia), Rosamond Dwyer (Peninsula Health, Victoria, Australia), George Plunkett (Melbourne Health, Victoria, Australia), Anne-Maree Kelly (Western Health, Victoria, Australia), Hugh Mitenko (WA Country Health Service, Western Australia), Michael Lovegrove (Joondalup Health Campus, Western Australia), Ben Smedley (Rockingham General Hospital, Western Australia), Colin A. Graham and Ling Yan Leung (Prince of Wales Hospital, Hong Kong SAR), Win Sen Kuan and Ying Wei Yau (National University Hospital, Singapore), Wei Ming Ng (Ng Teng Fong General Hospital, Singapore), Ranjeev Kumar (Khoo Teck Puat Hospital, Singapore), Dennis Wen Jie Chia (Sengkang General Hospital, Singapore), Said Laribi (CHU Tours, Tours, France), Mounir Hilal and Rarthtana Mil (CH Vendôme, France), Audrey Gerineau (CHR Orléans, France), Matthew J. Reed (Emergency Medicine Research Group Edinburgh [EMERGE], Royal Infirmary of Edinburgh, United Kingdom), Daniel Horner (Salford Royal NHS Foundation Trust, Salford, United Kingdom), Edward Carlton and Tom Roberts (North Bristol NHS Trust, United Kingdom), Girish Boggaram and Jayne Foot (Musgrove Park Hospital, Taunton, United Kingdom), Andy Appleboam, Rachel Goss and Hamza Malik (Royal Devon and Exeter NHS Foundation, United Kingdom), Richard Body (Manchester Royal Infirmary, Manchester, United Kingdom), John-Paul Williamson (Royal Oldham Hospital, Oldham, United Kingdom), Adela Golea and Sonia Luka (University County Hospital Cluj-Napoca, Romania), Huseyin Avni Demir (University of Health Sciences Mehmet Akif Inan Training and Research Hospital, Department of Emergency Medicine, Şanlıurfa Turkey), Şafak Öner Gülpinar (Tokat Erbaa Government Hospital, Tokat, Turkey), Lale Tolu (Bursa Çekirge Government Hospital of Emergency Service, Bursa, Turkey), Muhammet Hacimustafaoğlu (Hakkari Yuksekova Government Hospital, Hakkari, Turkey), Mehmet A. Karamercan (Gazi University Faculty of Medicine Department of Emergency Medicine, Ankara, Turkey), Elif Çelikel (Numune Research and Training Hospital, Department of Emergency Medicine, Ankara, Turkey), Çilem Çaltili (Unıversıty of Health Sciences Bağcılar Training and Research Hospital, Department of Emergency Medicine, Istanbul, Turkey), Selahattin Gürü (Yıldırım Beyazıt University Faculty of Medicine Department of Emergency Medicine, Ankara, Turkey), Gülşah Yavuz (Antalya Ataturk Government Hospital of Medicine, Department of Emergency Medicine, Antalya, Turkey), Franck Verschuren (Institute of Experimental and Clinical Research, Emergency Department, Saint-Luc University Hospital, Brussels, Belgium), Christopher Ramos (Emergency Department, Saint-Luc University Hospital, Brussels, Belgium), Paule Denoel and Nicolas Wilmet (Saint Michel, Clinique de l'Europe, Etterbeek, Brussels), Michael Vandoorslaert and Alessandro Manara (Saint Elisabeth, Clinique de l'Europe, Uccle, Brussels), Adeline Higuet (CHR Hal, Belgium), Amichai Sheffy (Tel-Aviv Sourasky Medical Center, Israel), Sinan Kamona and Peter Jones (University of Auckland, School of Medicine, Auckland, New Zealand), Mai Nguyen (Wellington Hospital, Wellington, New Zealand), Anne Clarke (Hutt Valley Hospital, Lower Hutt, New Zealand), Sierra Beck (Dunedin Hospital, Dunedin, New Zealand), Andrew Munro (Nelson Hospital, Nelson, New Zealand), Kim M. Yates (North Shore and Waitakere Hospitals, Waitematā District Health Board, New Zealand), James Weaver (Christchurch Hospital, Christchurch, New Zealand), Deborah Moore and Stuart Innes (Tauranga Hospital, Tauranga, New Zealand), Karina Walters (Taranaki District Health Board, New Zealand), and Koen Simons (Statistician, Office for Research, Western Health and University of Melbourne, Victoria, Australia). *Steering Committee*: Anne-Maree Kelly, Kevin Chu, Tissa Wijeratne, Frances B. Kinnear, Gerben Keijzers, Sinan Kamona, Win Sen Kuan, Colin Graham, Richard Body, Said Laribi, Sharon Klim, Mehmet Karamercan, and Tom Roberts. *Co*-*ordinating Centre*, *Western Health*, *Victoria*, *Australia*: Anne-Maree Kelly, Sharon Klim, and Kerrie Russell.
